# Supplementary material for: Seasonal variations in groundwater chemistry and quality and associated health risks from domestic wells and crucial constraints in the Pearl River Delta
Source: Royal Society of Chemistry journal article supplement (doi:10.1039/d4em00622d), 2025-01-01
Supplement: d4em00622d1.xlsx [file d4em00622d1.xlsx]

## Sheet: groundwater chemistry
	2021.07 wet season																									2022.01 dry season
Sample No.	pH	mvORP	ppmDO	us/cm conductivity	ppmTdS	hardness mg/L（CaCO3）	Na(ppm)	Mg(ppm)	Si(ppm)	K(ppm)	Ca(ppm)	Fe,ppb(MS)	FeII ,ppb	Mn, ppb	TOC,ppm	TAs,ppb	As(III)%	P,ppb	Br,ppb	Cl-,ppm	NO3-,ppm	SO42-,ppm	δ18O/‰	δD/‰		pH	mvORP	ppmDO	us/cm conductivity	ppmTdS	hardness mg/L（CaCO3）	Na(ppm)	Mg(ppm)	Si(ppm)	K(ppm)	Ca(ppm)	Fe,ppb(MS)	FeII ,ppb	Mn, ppb	TOC,ppm	TAs,ppb	As(III)%	P,ppb	Br,ppb	Cl-,ppm	NO3-,ppm	SO42-,ppm	δ18O/‰	δD/‰
G1	7.15	40.8	4.27	644	322	150.668	15.3936	4.02765	9.29886	30.7164	51.0376	31.025	36.1054	84.136	3.59	4.157	0	1553.34	70	55.9383	60.7028	50.3204	-5.91632	-34.1629		6.87	113.2	3.8	1225	613	211.499	8.28784	1.10672	7.8076	8.9013	12.6906	31.2315	11.0012	30.706	2.719	3.67681	22.4209	669.028	464.118	64.8435	55.5291	65.1623	-6.90763	-40.5239
G2	7.17	96.4	4.78	771	385	144.476	18.612	7.04244	11.619	40.9694	56.5059	6.852	0	22.535	0	2.049	0	666.598	164.86	77.5926	102.612	90.7923	-6.0673	-36.4423		6.94	89.1	4.36	1456	728	208.716	10.6445	1.74817	13.3587	12.2579	19.0132	13.4883	4.3743	8.77075	3.864	6.35938	0.78624	625.023	70	82.1952	87.9365	88.7833	-7.12404	-40.9016
G3	7.28	-7.3	3.44	461	231	90.8137	12.3244	2.51375	2.90433	25.266	31.7001	326.601	104.867	227.941	2.604	2.215	0	117.272	70	57.4486	3.7971	63.8095	-6.15384	-36.3278		6.42	140.5	4.46	480	240	136.361	2.75917	0.398356	3.4066	2.23246	5.2496	24.1982	0	21.7453	1.711	3.10346	4.50884	90.7685	106.312	30.0714	50.8417	23.5339	-7.45598	-39.6671
G4	6.64	57.1	3.41	371	186	84.6219	7.88612	2.84651	3.94832	10.1714	34.6176	89.007	70.486	21.905	1.933	0.111	0	10.287	92.3216	35.1915	34.6511	54.579	-6.07595	-36.5539		6.38	148.8	3.99	673	336	116.881	1.26777	0.337374	4.15328	0.971512	5.01269	2.65255	11.0012	0.66426	3.208	0.210758	100	37.226	200.472	18.5587	34.3476	17.383	-7.25387	-38.7786
G5	6.86	112.6	4.94	782	391	132.093	21.1994	7.14843	2.48038	65.2605	42.1946	0.01	7.4549	2.895	2.083	0.24	0	0	679.223	91.0503	89.7239	102.205	-5.98844	-37.4034		6.76	129.1	5.17	1242		136.361	9.0093	1.27711	3.1205	14.9447	9.4374	7.69403	24.255	4.13967	1.923	2.37485	3.88716	37.226	70	67.8388	79.6715	86.6022	-7.12507	-39.2404
G6	7.35	96.3	4.8	572	286	156.86	8.36516	4.90996	15.9611	22.0443	58.822	1.576	0	1.727	1.728	7.809	0	1892.81	481.391	38.913	78.8695	36.6015	-6.17692	-36.3063		7.02	97.4	3.71	1204	602	236.545	3.76246	0.975931	18.2685	6.2997	15.4293	0	24.255	0.00524	1.699	13.0212	3.08424	1964.76	194.194	43.9992	70.2167	51.6923	-7.26854	-39.2938
G7	7.66	78.2	3.99	747	374	169.244	10.1004	6.91408	17.5366	40.5249	74.828	12.829	1.7248	2.436	0.319	7.326	0	2047.11	70	40.7822	156.838	51.8168	-6.40963	-37.6647		7.24	89.1	4.49	1216	608	208.716	6.18289	0.00122688	18.9393	0.0752069	0.00904072	0	0	0.16637	4.774	13.5157	1.65117	1943.34	464.118	42.816	98.9681	46.6327	-7.14497	-40.7668
G8	7.53	87.8	4.51	674	337	196.075	9.01493	7.11024	16.9694	36.1876	66.3747	32.127	13.185	1.315	0.197	6.784	0	1429.89	652.846	45.6668	59.1595	59.4532	-6.4077	-37.8653		7.41	96.6	5.3	1232	616	253.242	2.43658	0.966706	18.5457	8.41505	15.7701	0	0	0.76765	2.828	12.1108	4.58321	1365.08	533.168	40.7408	53.9973	54.825	-7.83926	-40.6552
G9	7.76	51.1	3.68	654	327	206.395	9.75691	5.04874	17.453	20.7172	78.3995	14.506	0	15.91	2.125	5.337	38	1316.74	197.832	45.9971	41.9665	49.3321	-6.50558	-38.8736		7.36	110.8	4.79	1302	651	328.38	4.6639	1.06465	17.537	5.07623	21.4141	9.76221	0	17.6212	3.261	10.8687	6.01755	1472.16	482.95	54.2937	12.255	47.3131	-7.30833	-40.4539
G10	7.55	60.1	4.06	837	419	319.912	15.6428	6.35257	16.3537	19.5618	92.6805	18.205	11.6513	623.242	2.765	6.355	6	1543.05	70	67.0355	3.8426	48.0272	-6.31154	-37.6588		7.57	107.9	4.75	1242	621	642.845	4.48335	0.875466	12.1	4.7576	20.3349	13.8036	5.3136	2.37806	2.204	8.32869	8.14034	904.615	70	50.1898	12.7387	42.9892	-7.42562	-38.6538
G11	7.19	10.1	3.61	450	225	134.157	7.46726	3.86019	8.05033	11.5836	47.9121	64.317	64.0456	312.795	7.56	5.017	11	1368.17	70	32.9379	20.6806	43.2609	-6.06441	-36.7937		6.95	79.1	3.82	1108	554	214.282	3.8685	0.79731	8.16453	3.52364	13.5429	37.4088	73.8447	197.844	2.259	8.38011	5.03057	1932.63	70	51.4368	15.3876	48.1473	-7.20884	-36.9523
G12	7.51	8.3	3.65	604	302	206.395	9.54654	8.3918	10.7113	15.2322	68.961	46.794	40.628	557.839	4.214	3.806	56	69.9516	70	34.2569	2.1329	17.8602	-4.86818	-32.595		7.32	80.6	4.63	1187	594	322.814	5.08265	1.88174	11.0289	3.75116	18.3088	0	0	113.373	8.521	6.64977	8.45882	112.186	70	43.7353	3.2506	27.4485	-5.94278	-34.8615
G13	7.39	94.1	5.05	416	208	111.453	8.9087	4.43991	5.79904	19.0067	34.8354	4.919	0	3.366	3.595	15.043	0	292.151	70	38.0528	28.4286	58.9066	-5.86632	-36.777		7.43	166.2	6.74	763	381	141.927	4.36657	0.994625	6.51598	5.3043	9.89332	21.0961	37.7744	8.13071	1.92	21.6162	1.9904	347.772	947.47	38.1328	17.3336	53.2257	-6.63707	-38.8933
G14	7.65	-73.9	4.15	595	297	204.331	9.29163	4.06924	13.9176	12.4472	65.4534	81.195	5.5016	703.463	1.493	6.308	20	1594.48	70	42.0876	13.8287	51.2205	-6.51156	-38.662		7.66	7	4.41	1111	556	283.854	4.74146	0.938586	14.8643	3.51705	20.9825	0	0	694.837	2.531	11.5806	5.45425	1686.34	70	46.0977	15.2228	47.8881	-7.33137	-43.2461
G15	7.13	-52.1	3.28	357	179	119.709	6.06105	2.15853	8.88989	4.85207	38.6107	1742.45	1521.79	2211.47	3.91	50.511	71	962.863	70	34.3334	10.8423	17.8668	-5.46918	-32.8045		6.87	-15.2	3.01	667	333	169.756	2.25147	0.427186	9.67856	1.06375	10.8019	116.459	67.6146	651.79	10.05	37.2612	6.3642	594.068	70	31.1145	0.1044	17.8078	-6.47162	-36.7078
G16	7.25	85.5	3.93	471	236	113.517	6.43862	3.06901	13.6449	7.0236	55.5111	16.349	0	14.918	1.89	24.118	3	1666.49	70	32.5757	63.2993	44.0953	-6.05768	-34.9645		7.15	65.4	4.3	926	463	164.19	3.90013	0.82384	19.5439	1.79411	18.0585	0	0	1.30649	3.38	32.6016	1.94327	1664.92	821.924	35.5128	40.3197	54.4457	-6.88945	-37.9887
G17	7.49	65.7	3.99	598	299	175.436	7.72401	3.05123	17.2683	6.92798	75.8994	4.938	0	6.121	1.301	24.803	0	1676.78	52.7552	36.3646	56.7408	45.4306	-6.05095	-35.2728		7.43	71.8	5.23	1090	545	250.459	3.61912	0.671009	14.299	1.74422	19.9493	0	0	0.32325	1.461	36.4837	3.08772	1900.51	1016.52	39.4406	36.028	39.2954	-7.50939	-41.2508
G18	7.26	72.2	4.28	622	311	175.436	9.65072	5.49784	15.5201	18.3353	69.9046	21	23.3183	0	0.932	7.289	0	1738.5	70	44.4192	34.5284	54.6801	-6.23846	-35.811		7.11	147.4	4.21	1047	524	244.893	3.0521	0.835591	15.7952	4.3401	19.0321	0	57.5405	0.801	2.392	7.27351	6.11092	1493.58	70	40.2653	25.7838	43.8156	-8.02252	-43.2894
G19	7.25	101.4	4.57	661	330	185.755	8.67312	7.29998	11.9643	47.0362	61.6962	6	0	0	0	3.225	0	380.619	666.034	40.6	77.6435	59.3485	-6.33462	-38.387		7.18	136.5	5.94	1093	546	208.716	4.31365	1.5586	12.4975	13.108	15.6853	0	37.7744	0.06517	1.76	4.70011	6.00977	337.064	432.732	32.2518	72.4559	53.0745	-7.91256	-43.1505
