# Supplementary material for: Seasonal variations in groundwater chemistry and quality and associated health risks from domestic wells and crucial constraints in the Pearl River Delta
Source: Royal Society of Chemistry journal article supplement (doi:10.1039/d4em00622d), 2025-01-01
Supplement: d4em00622d2.pdf [file d4em00622d2.pdf]

*Supplementary material*

Seasonal variations in groundwater chemistry, quality, and associated health risks from domestic wells and crucial constraints in the Pearl River Delta

Xingyu Zhou<sup>a, 1</sup>, Jia Sun<sup>a, 1</sup>, Hulong Yi<sup>a</sup>, Tiancai Ye<sup>a</sup>, Yanping Zhao<sup>b</sup>, Yuzhong Yang<sup>c, d</sup>, Zijun Liu<sup>a</sup>, Changhang Liang<sup>a</sup>, Jiawei Huang<sup>a</sup>, Jingcheng Chen<sup>e</sup>, Tangfu Xiao<sup>a</sup>, Jinli Cui<sup>a</sup>

\*

<sup>a</sup>Key Laboratory for Water Quality and Conservation of the Pearl River Delta, Ministry of Education, School of Environmental Science and Engineering, Guangzhou University, Guangzhou 510006, China

<sup>b</sup>Guangdong Provincial Key Laboratory of Chemical Measurement and Emergency Test Technology, Institute of Analysis, Guangdong Academy of Sciences (China National Analytical Center, Guangzhou), Guangzhou, 510070, China

<sup>c</sup>State Key Laboratory of Frozen Soil Engineering, Northwest Institute of Eco-Environment and Resources, Chinese Academy of Sciences, Lanzhou, 730000, China

<sup>d</sup>Key Laboratory of Cryospheric Science and Frozen Soil Engineering, Chinese Academy of Sciences

<sup>e</sup>Guangzhou Prin-Cen Scientific Ltd., Guangzhou, 510520, China

Corresponding author (Jinli Cui): E-mail address: [jlcai@gzhu.edu.cn](mailto:jlcai@gzhu.edu.cn). ORCID: 0000-0002-0299-7911

<sup>1</sup> Co-first author.

### Health risk assessment

The average daily dose (ADD) was estimated to calculate the hazard quotient and cancer risk via the following equations [1-3].

$$ADD_{ing} = \frac{C \times IR \times EF \times ED}{BW \times AT} \quad (5)$$

$$ADD_{dermal} = \frac{C \times SA \times Kp \times ET \times EF \times ED \times CF}{BW \times AT} \quad (6)$$

where, C is the elemental concentration, IR is the ingestion rate (L/day, 2.0 for adults and 0.64 for children); EF is the exposure frequency (360 days/year); ED is the exposure duration (years, 30 for adults and 6 for children); BW is the average body weight (kg, 63.5 for adults and 16.6 for children [4]; and AT is the average exposure time in days (ED×365 days/year, i.e., 10,950 for adults and 2190 for children). The additional parameters in equation (6) include the following: SA is the area of skin exposed (cm<sup>2</sup>, 18,000 for adults and 6600 for children); Kp is the dermal permeability coefficient (cm/h, 0.001 for As, Cd, Cr, and Cu and 0.0001 for Pb); ET is exposure time (h/day, 0.58 for adults and 1 for children); and CF is the volumetric conversion factor for groundwater (1 L/1000 cm<sup>3</sup>).

Noncarcinogenic health risk (health quotient, HQ) from groundwater through ingestion and dermal absorption was estimated via equation (7):

$$HQ = \frac{ADD_{ing/dermal}}{RfD} \quad (7)$$

where the RfD value is the reference dose (µg/kg/day). The RfD values for exposure through the mouth oral or skin are Fe (300/45), Cu (40/12), Pb (1.4/0.42), Ni (20/5.4), Cr (3/0.015), Cd (0.5/0.005), As (0.3/0.3), and NO<sub>3</sub><sup>-</sup> (1600/1600) according to previous studies [5, 6].

The overall noncarcinogenic effects are summarized as HQ from all the contaminants and expressed as hazard indices (HI). Assuming that the risk is cumulative, the total noncarcinogenic risk after oral consumption or skin contact of contaminated

groundwater can be assessed using the total hazard index (THI) calculated according to  $THI = HI_{ing} + HI_{dermal}$ . If the HI or THI value is greater than 1, a potential noncarcinogenic health risk is likely present for local residents [5, 7].

The carcinogenic risk (cancer risk, CR) from exposure through ingestion was determined [6] via equation 8:

$$CR = ADD \times SF(8)$$

where SF is the slope factor  $(mg/kg/day)^{-1}$  for risk via ingestion and is 1.5 for As. Other potential carcinogenic metals like Cr, Pb, and Cd were not considered because they did not show elevated concentrations than the recommendation. Values of  $CR < 10^{-6}$  suggest a very low cancer risk,  $10^{-6} < CR < 10^{-4}$  suggests lower cancer risk,  $10^{-4} < CR < 10^{-3}$  suggests moderate cancer risk, and  $10^{-3} < CR < 0.1$  and  $CR > 0.1$  suggest a higher and strong higher cancer risk through prolonged exposure to the metals in groundwater [5].

Table S1 The values of coefficients ( $S_i$ ,  $I_i$ , guideline value, and  $W_i$ ) used in HPI computation.

| Heavy Metal | $S_i$ ( $\mu g/L$ ) | $I_i$ ( $\mu g/L$ ) | $W_i$ |
|-------------|---------------------|---------------------|-------|
| As          | 10                  | -                   | 0.100 |
| Pb          | 10                  | -                   | 0.100 |
| Ni          | 70                  | 20                  | 0.014 |
| Fe          | 300                 | -                   | 0.003 |
| Cu          | 1500                | 50                  | 0.001 |
| Cr          | 50                  | -                   | 0.02  |
| Cd          | 3                   | -                   | 0.333 |

Table S2 Assigned weights of drinking water quality parameters

| <b>Chemical parameter (i)</b>        | <b>Drinking water quality standard (DWQS)</b> | <b>Weight assessment (AW)</b> | <b>Relative weight (RW)</b> |
|--------------------------------------|-----------------------------------------------|-------------------------------|-----------------------------|
| pH                                   | 8.5                                           | 4                             | 0.095                       |
| TDS (mg/L)                           | 500                                           | 5                             | 0.119                       |
| TH (mg/L)                            | 300                                           | 2                             | 0.048                       |
| Ca <sup>2+</sup> (mg/L)              | 75                                            | 2                             | 0.048                       |
| Mg <sup>2+</sup> (mg/L)              | 30                                            | 2                             | 0.048                       |
| Na <sup>+</sup> (mg/L)               | 200                                           | 4                             | 0.095                       |
| K <sup>+</sup> (mg/L)                | 12                                            | 2                             | 0.048                       |
| HCO <sub>3</sub> <sup>-</sup> (mg/L) | 300                                           | 1                             | 0.023                       |
| Cl <sup>-</sup> (mg/L)               | 250                                           | 5                             | 0.119                       |
| SO <sub>4</sub> <sup>2-</sup> (mg/L) | 200                                           | 5                             | 0.119                       |
| NO <sub>3</sub> <sup>-</sup> (mg/L)  | 45                                            | 5                             | 0.119                       |
| F <sup>-</sup> (mg/L)                | 1.5                                           | 5                             | 0.119                       |
| Σ                                    |                                               | 42                            | 1                           |

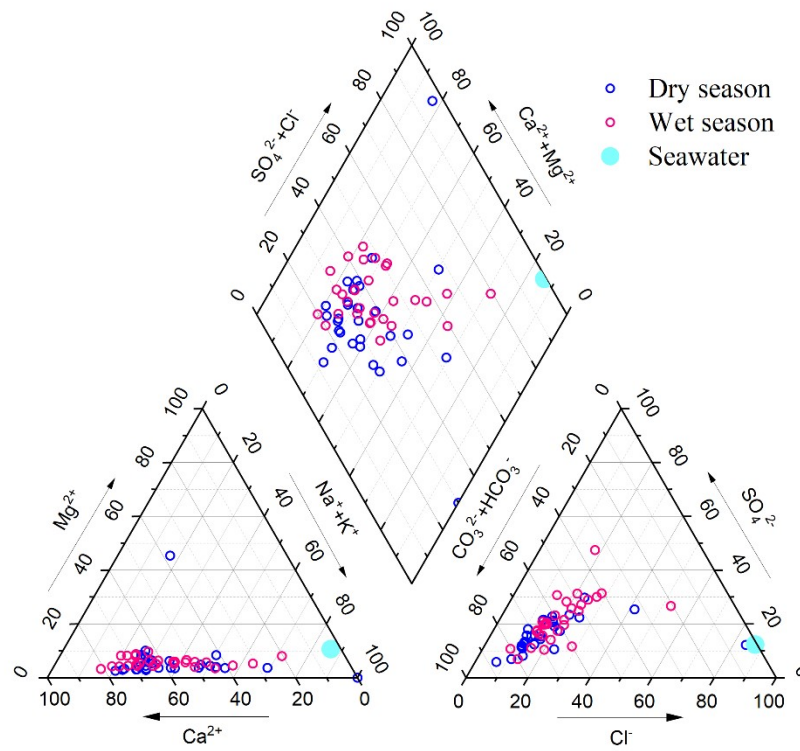

Fig. S1. Piper diagram for the main geochemical types of shallow groundwater in the wet and dry seasons from the Pearl River Delta. Seawater is also plotted as a blue filled circle [8].

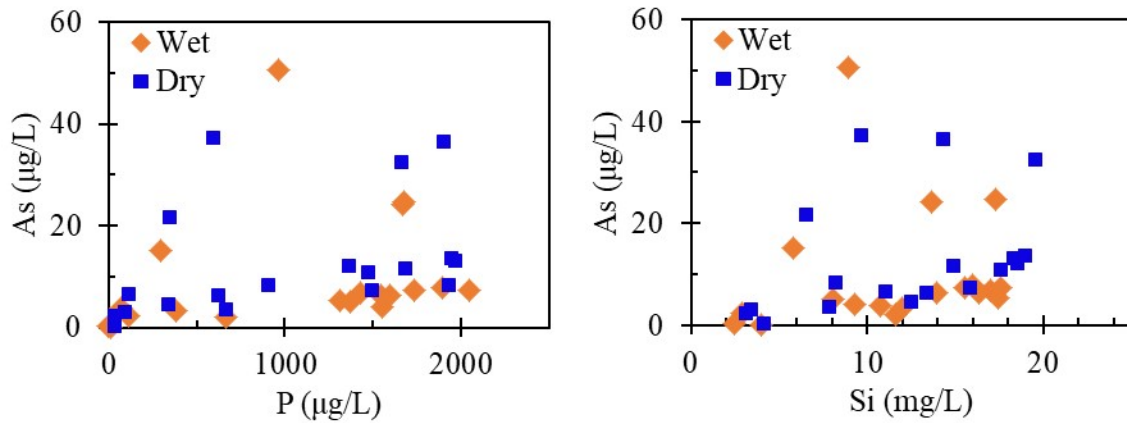

Fig. S2. Changing trend between As and P or Si in the groundwater.

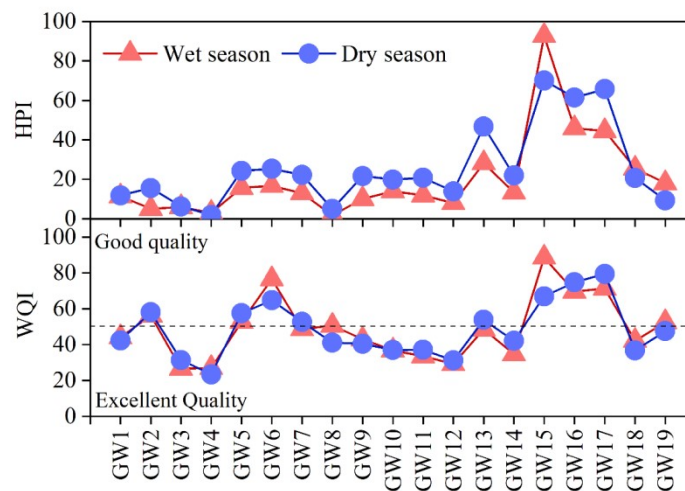

Fig. S3. Heavy metal pollution index (HPI) and water quality assessment (WQI) of shallow groundwater from domestic wells in the Pearl River Delta. Groundwater with a threshold HPI value below 100 is suitable for drinking [1]. The WQI value indicate that the water quality is excellent (< 50), good (50–100), poor (100–200), very poor (200–300), and unsuitable for drinking (>300) [9].

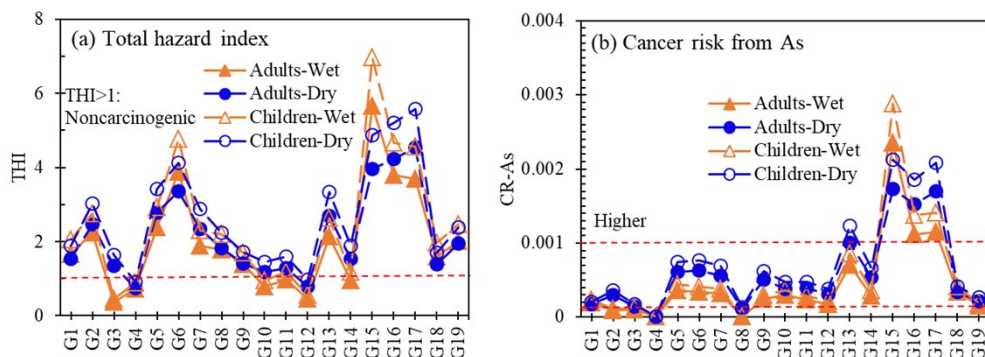

Fig. S4. Total hazard index (THI, a) and cancer risk from As (b) of groundwater samples from domestic wells in the Pearl River Delta in the dry and wet seasons. Except for As, no carcinogenic risk was estimated from other elements with permissible concentrations in groundwater in this work. A THI value greater than 1 represents a potential noncarcinogenic health risk, and cancer risk value:  $10^{-6} < CR < 10^{-4}$  suggests lower cancer risk and  $10^{-4} < CR < 10^{-3}$  suggests moderate cancer risk [5].

## References

- [1] E. C. Ezeudu, C. C. Offor, C. C. Oli, A. S. Nzelu, Groundwater contamination and its potential health risk in Oba community, Anambra State, southeastern Nigeria: an index analysis approach, *Environmental Chemistry and Ecotoxicology* 6 (2024) 1-14.
- [2] USEPA, Risk Assessment Guidance for Superfund Volume 1. Human Health Evaluation Manual (Part E, Supplemental Guidance for Dermal Risk Assessment) EPA/540/R/99/005 Office of Superfund Remediation and Technology Innovation; U.S. Environmental Protection Agency, Washington, DC, (2004).
- [3] R. Yuan, Z. Li, S. Guo, Health risks of shallow groundwater in the five basins of Shanxi, China: Geographical, geological and human activity roles, *Environmental Pollution* 316 (2023) 120524.
- [4] GDTYJ, The 2020-2021 Guangdong Province National Physical Fitness Monitoring Report, [https://tyj.gd.gov.cn/bigdata\\_qzty/content/post\\_4074341.html](https://tyj.gd.gov.cn/bigdata_qzty/content/post_4074341.html), (2023).
- [5] I. Mukherjee, U. K. Singh, R. P. Singh, Anshumali, D. Kumari, P. K. Jha, P. Mehta, Characterization of heavy metal pollution in an anthropogenically and geologically influenced semi-arid region of east India and assessment of ecological and human health risks, *Science of The Total Environment* 705 (2020) 135801.
- [6] USEPA, Regional Screening Levels (RSLs) - Generic Tables, <https://www.epa.gov/risk/regional-screening-levels-rsls-generic-tables>, (2024).
- [7] J. Cui, J. Shi, G. Jiang, C. Jing, Arsenic Levels and Speciation from Ingestion Exposures to Biomarkers in Shanxi, China: Implications for Human Health, *Environmental Science & Technology* 47 (2013) 5419-5424.

- [8] Y. Wang, J. J. Jiao, Origin of groundwater salinity and hydrogeochemical processes in the confined Quaternary aquifer of the Pearl River Delta, China, *Journal of Hydrology* 438 (2012) 112-124.
- [9] M. El Baba, P. Kayastha, M. Huysmans, F. De Smedt, Evaluation of the Groundwater Quality Using the Water Quality Index and Geostatistical Analysis in the Dier al-Balah Governorate, Gaza Strip, Palestine, *Water* 12 (2020) 262.
